# Supplementary material for: Heterogeneity in VEGFR3 levels drives lymphatic vessel hyperplasia through cell-autonomous and non-cell-autonomous mechanisms
Source: PubMed Central journal article supplement (PMC5882855; doi:10.1038/s41467-018-03692-0), 2018-04-03
Supplement: 41467_2018_3692_MOESM1_ESM.pdf [file 41467_2018_3692_MOESM1_ESM.pdf]

## **Supplementary Information**

**Heterogeneity in VEGFR3 levels drives lymphatic vessel hyperplasia through cell-autonomous and non-cell-autonomous mechanisms**

Zhang et al.

Supplementary Figures

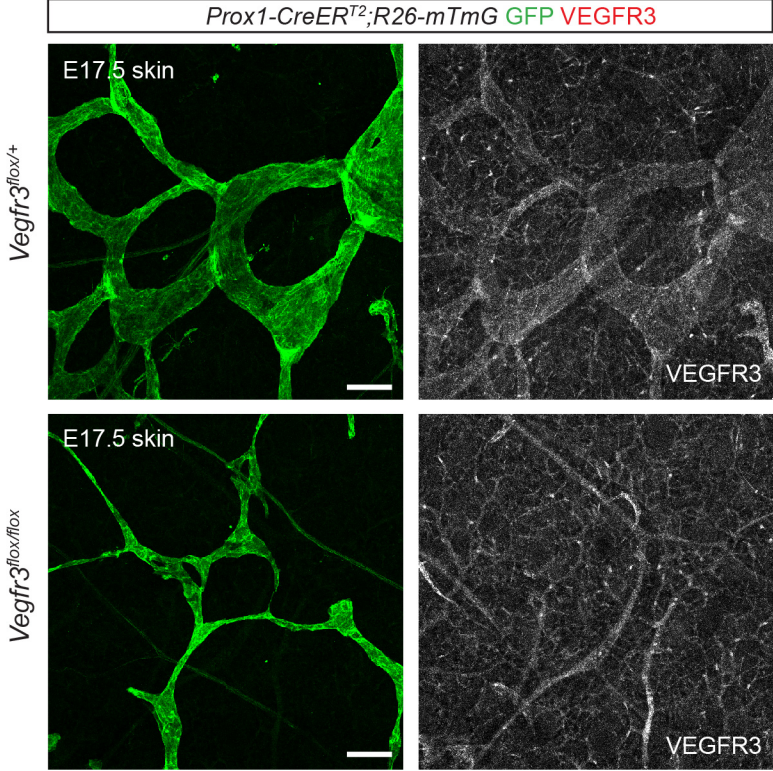

**Supplementary Figure 1 | Efficient VEGFR3 protein depletion in dermal lymphatic vessels in the *Vegfr3<sup>lox</sup>;R26-mTmG;Prox1-CreERT<sup>2</sup>* embryos.** Whole-mount immunofluorescence of E17.5 embryonic skin. Cre activity was induced by 4-OHT (1 mg) administration to pregnant females on 6 consecutive days starting at E10. Scale bars: 100  $\mu$ m.

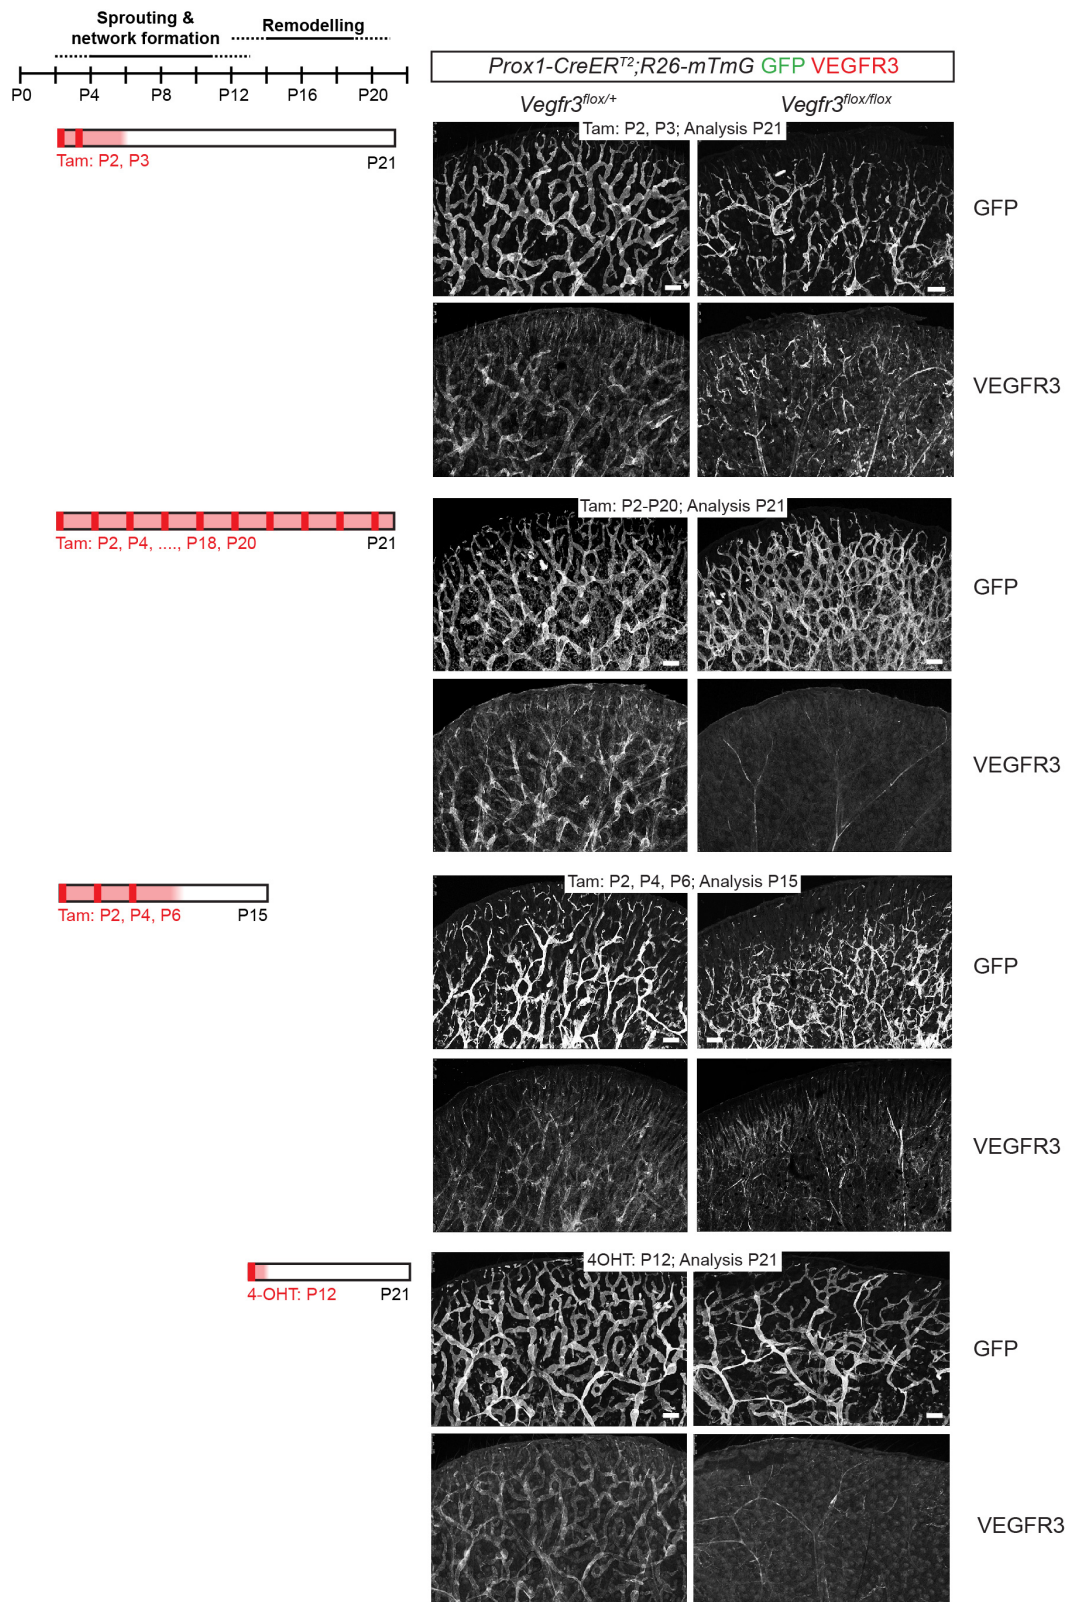

**Supplementary Figure 2 | Time course analysis of the effect of postnatal *Vegfr3* deletion on dermal lymphatic development.** Left: Tamoxifen administration schedule. Cre induction ( $n \times 150 \mu\text{g}$  of Tam or  $100 \mu\text{g}$  of 4-OHT) in red and expected effective period (72 h for Tam and 24 h for 4-OHT) in light red are shown. Right: Single channel images of whole-mount immunofluorescence of ear skin for GFP and VEGFR3 of indicated stages and Tamoxifen/4-OHT treatment regimes. Scale bars:  $200 \mu\text{m}$ .



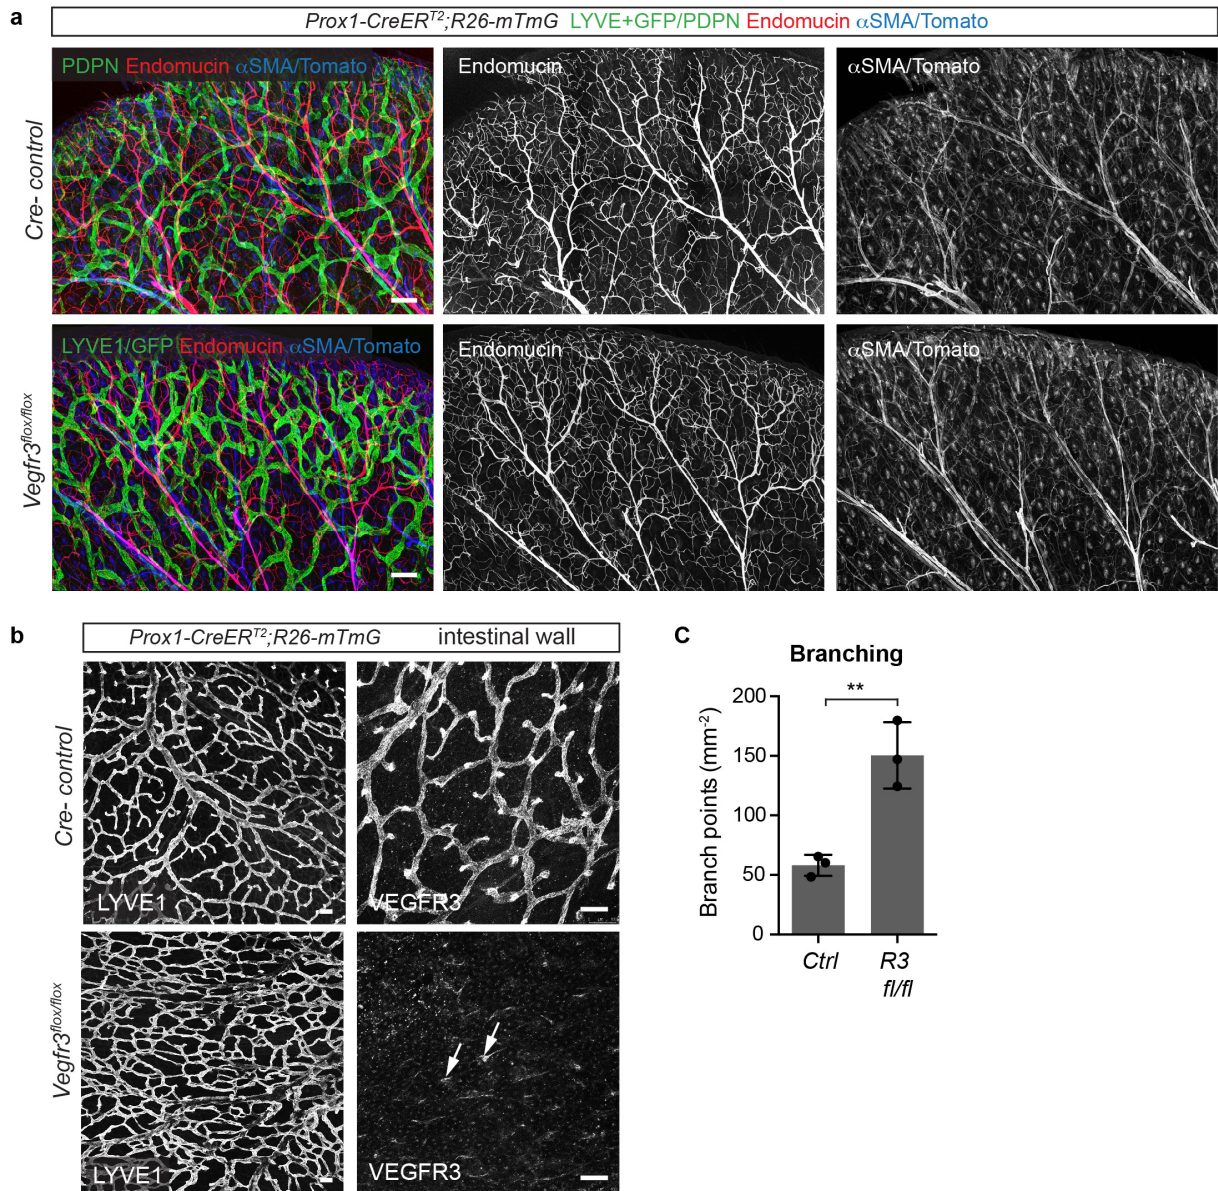

**Supplementary Figure 3 | Analysis of the dermal blood and intestinal lymphatic vasculatures in the *Vegfr3<sup>flox</sup>;R26-mTmG;Prox1-CreER<sup>T2</sup>* mice.** Whole-mount immunofluorescence of ear skin (**a**) and intestinal wall (**b**) of 3 weeks old *Vegfr3<sup>flox/flox</sup>;R26-mTmG;Prox1-CreER<sup>T2</sup>* and Cre-negative littermate mice treated with Tamoxifen at P2, P4 and P6. Note normal dermal blood vasculature in mutant in comparison to control mice (**a**), visualized by staining with antibodies against Endomucin (showing veins and capillaries), and  $\alpha$ SMA (smooth muscle cells) on the same channel with Tomato signal from the *R26-mTmG* reporter. Lymphatic vessels were visualized by staining for PDPN in Cre<sup>-</sup> controls, and for both LYVE1 and GFP in Cre<sup>+</sup> mutants. (**b**) shows hyperbranched intestinal lymphatic vasculature (left panels) and efficient depletion of VEGFR3 (right panels) except for residual non-targeted VEGFR3<sup>+</sup> cells (arrows) in the mutant. (**c**) Quantification of vessel branch points in lymphatic vasculature of the intestinal wall. Bars represent mean (n=3 mice)  $\pm$  s.d. \*\*  $P < 0.01$ . Two-tailed unpaired Student's *t*-test. Scale bars: 200  $\mu$ m (**a**), 100  $\mu$ m (**b**).



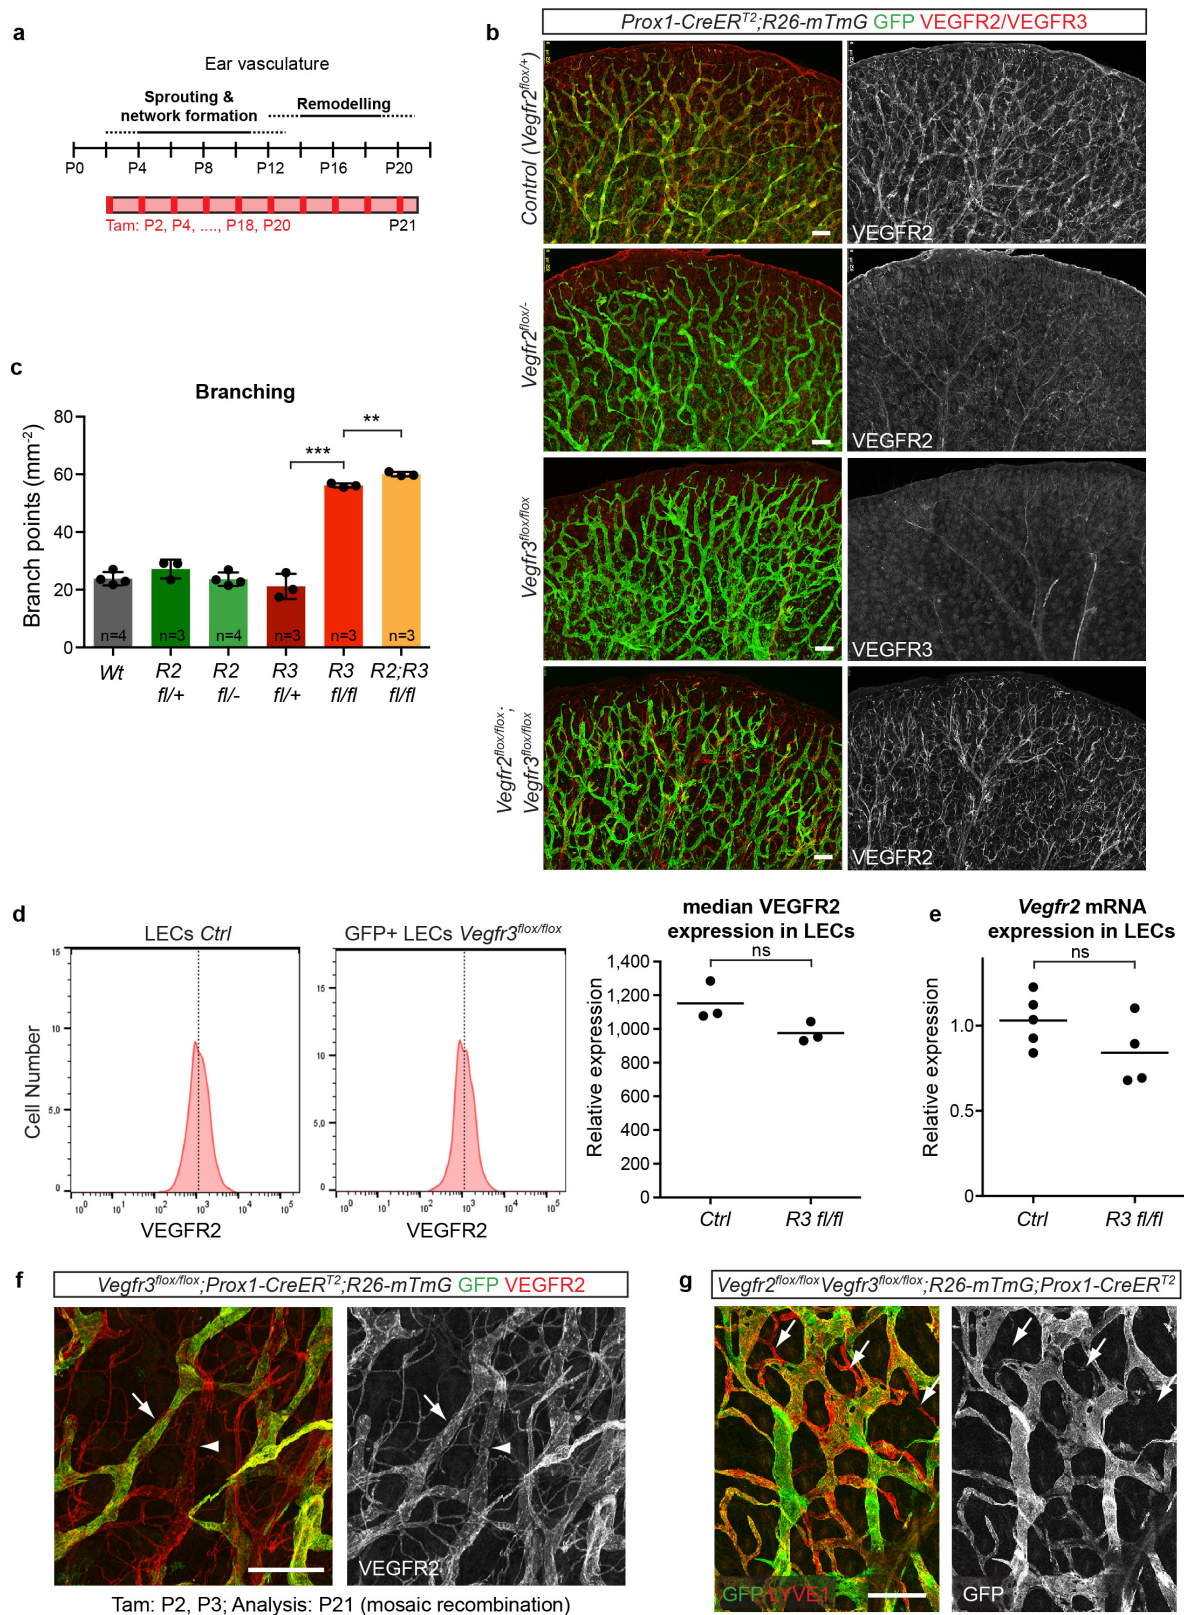

**Supplementary Figure 4 | Analysis of the contribution of VEGFR2 to postnatal dermal lymphatic development and *Vegfr3* loss driven vessel hyperplasia.** (a) Tamoxifen administration schedule (Cre induction, red (10 × 150 μg); and expected effective period (72 h), light red) and the timing of dermal lymphatic vessel formation in the ear. (b) Whole-mount immunofluorescence of ear skin of 3 weeks old mice of indicated genotypes. Single channel

images for VEGFR2 or VEGFR3 staining are shown. (c) Quantification of vessel branch points. Bars represent mean (n=3-4 mice, as indicated)  $\pm$  s.e.m. Data for *Ctrl*, *R3 fl/+* and *R3 fl/fl* are presented again (from Fig. 2e) for comparison. (d) Representative FACS histogram of VEGFR2 expression in GFP<sup>+</sup> LECs (gated based on co-expression of PECAM1 and PDPN) from P9 *Vegfr3<sup>lox/lox</sup>;R26-mTmG;Prox1-CreER<sup>T2</sup>* mice compared to a Cre<sup>-</sup> littermate. Dotted line displays median. Graph on the right shows median expression in littermate (Cre<sup>-</sup> (n=2) and Cre<sup>+</sup> *R3 fl/+* (n=1)) controls (*Ctrl*) and mutant (*R3 fl/fl*, n=3) mice, horizontal line represents mean. (e) *Vegfr2* mRNA expression in sorted LECs from P13-P14 *Vegfr3<sup>lox/lox</sup>;R26-mTmG;Prox1-CreER<sup>T2</sup>* mice and Cre<sup>-</sup> controls. Horizontal line represents mean (n=5 *Ctrl* and n=4 *R3 fl/fl* mice with n=2 technical replicates for each). (f) Whole-mount immunofluorescence of ear skin of 3 weeks old mice. Note similar VEGFR2 expression in targeted GFP<sup>+</sup> (i.e. VEGFR3<sup>-</sup>) (arrow) and non-targeted GFP<sup>-</sup> (i.e. VEGFR3<sup>+</sup>) (arrowhead) vessels. (g) Whole-mount immunofluorescence of *Vegfr2<sup>lox/lox</sup>;Vegfr3<sup>lox/lox</sup>;R26-mTmG;Prox1-CreER<sup>T2</sup>* ear skin showing vessel interconnections (arrows) formed of non-targeted (GFP<sup>-</sup>) LYVE1<sup>+</sup> LECs. \*\*  $P < 0.01$ , \*\*\*  $P < 0.001$ , ns = not significant. Two-tailed unpaired Student's *t*-test (c, d, e). Scale bars: 200  $\mu$ m (b, f, g).

Sort scheme for mouse LECs (P13-P14 ear skin)

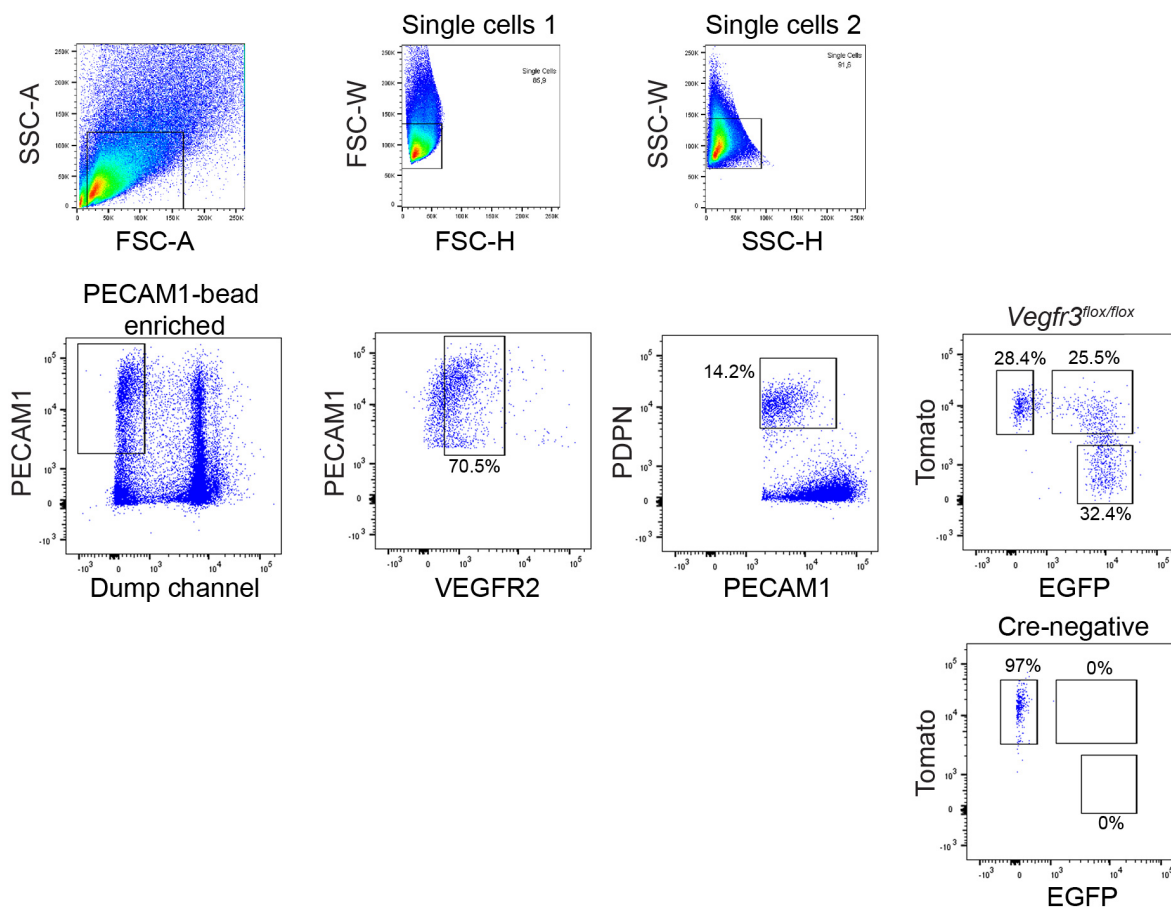

**Supplementary Figure 5 | Isolation of dermal LECs by flow cytometry.** Sort scheme for mRNA and genomic DNA analysis of LECs from *Vegfr3<sup>lox/lox</sup>;R26-mTmG;Prox1-CreERT<sup>2</sup>* and Cre<sup>-</sup> control mice. ECs were enriched using CD31/PECAM1 magnetic microbeads. Single cells were gated using FSC-A/SSC-A followed by FSC-H/FSC-W and SSC-H/SSC-W. LECs were gated in three steps; 1. PECAM1<sup>high</sup>, dump channel<sup>-</sup> cells, 2. PECAM1<sup>+</sup>, VEGFR2<sup>+</sup> (ECs), 3. PDPN<sup>+</sup> (LECs). LECs were subsequently sorted based on GFP and Tomato expression as indicated.



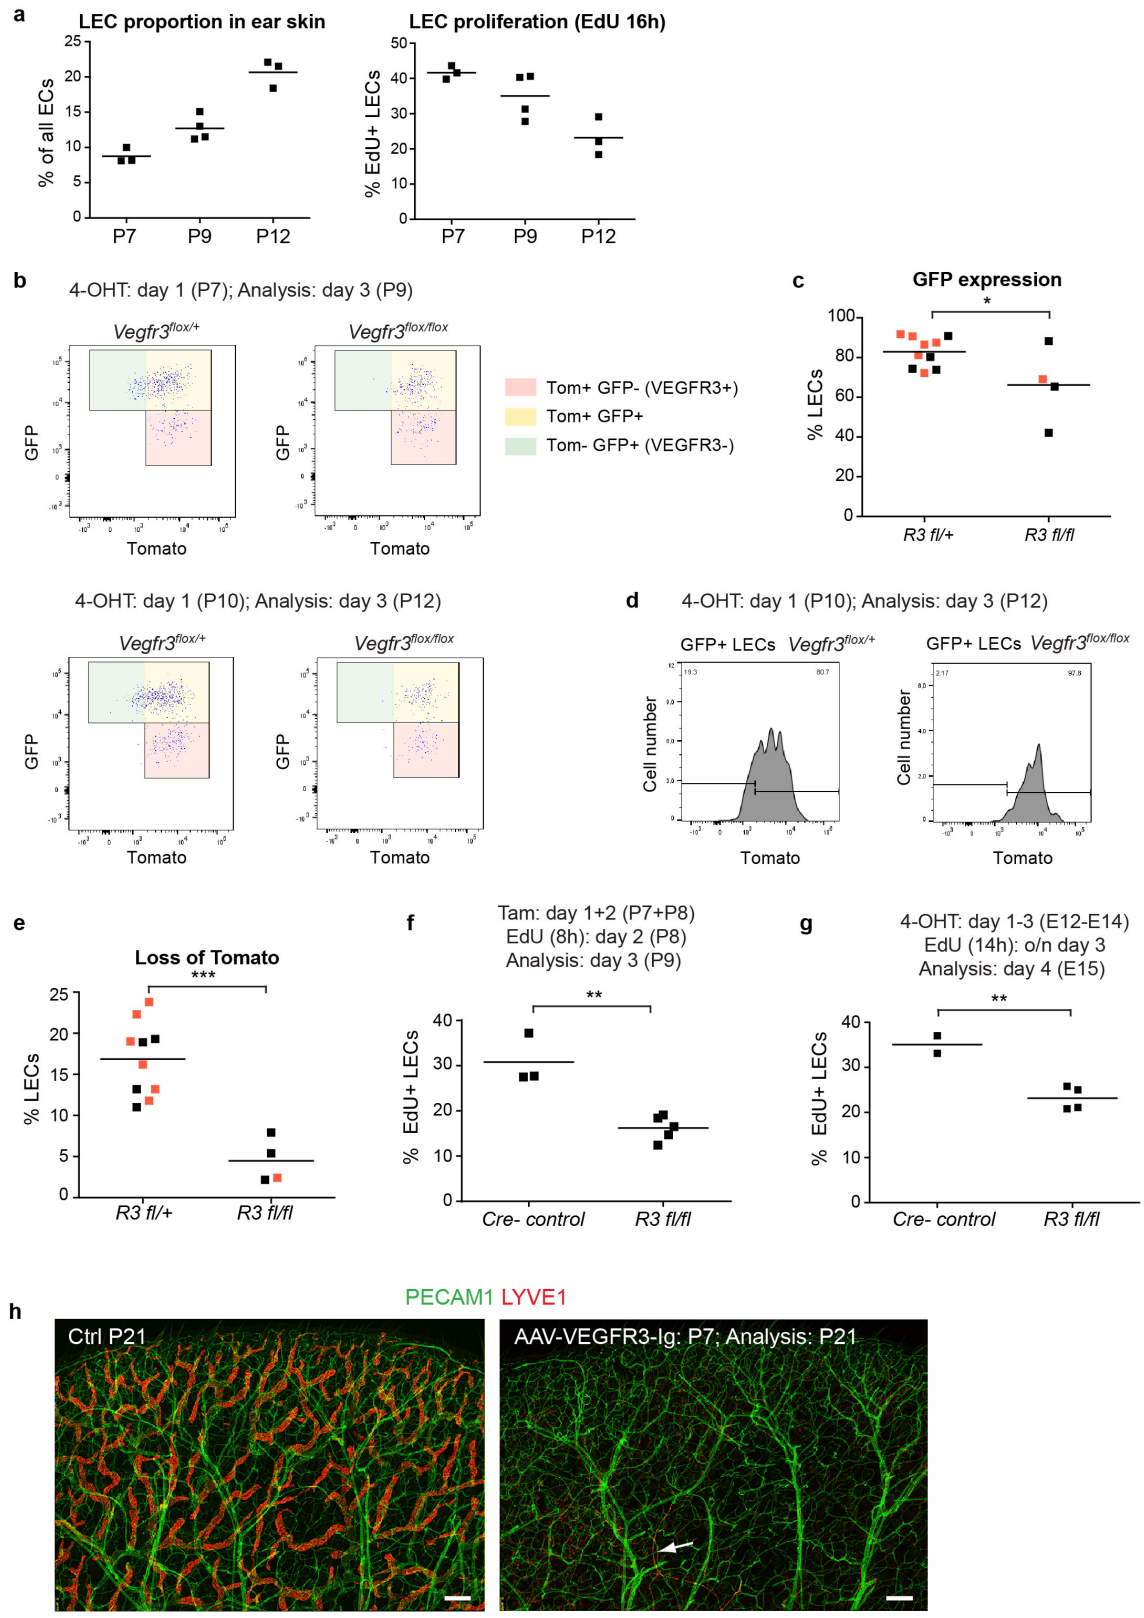

**Supplementary Figure 6 | VEGFR3 contributes to the survival and proliferation of dermal LECs during early postnatal development.** (a) LEC proportions (expressed as % PDPN<sup>+</sup> ECs (LECs) of all PECAM1<sup>+</sup> ECs) and proliferation (EdU incorporation for 16 h) determined in Cre<sup>-</sup> Tamoxifen treated pups at P7, P9 and P12 by flow cytometry. Horizontal lines represent mean (n=3-4 mice). (b-e) Analysis of Cre-mediated recombination after short-term induction.

Ear skin from P9 (upper plots) or P12 (lower plots) *Prox1-CreER<sup>T2</sup>* positive pups carrying heterozygous (n=10) or homozygous (n=4) *Vegfr3<sup>fllox</sup>* allele and the *R26-mTmG* reporter were analyzed 2 days after administration of a single i.p. injection of 50  $\mu$ g 4-OHT. Representative dot plots (**b**, P9 and P12) and histograms (**d**, P12 only) are shown. Summary graphs show GFP (**c**) and Tomato (**e**) expression in P9 (red squares) and P12 (black squares) mice. Note similar recombination efficiency (GFP expression, **c**) but selective reduction of GFP<sup>+</sup> LECs that have lost Tomato expression in the mutant (*R3 fl/fl*) LECs (**e**), as evaluated by percentage of GFP<sup>+</sup> Tomato<sup>-</sup> cells within the total GFP<sup>+</sup> LEC population. (**f**) Proliferation (EdU incorporation for 8h) determined by flow cytometry in control Cre<sup>-</sup> (n=2) or Cre<sup>+</sup> *R3 fl/+* (n=1), and mutant Cre<sup>+</sup> *R3 fl/fl* (n=5) P9 pups induced with Tamoxifen at P7 and P8. Horizontal lines represent mean. (**g**) Proliferation (EdU incorporation 14 h) determined by flow cytometry in E15 thoracic dorsal skin from control Cre<sup>-</sup> (n=2) and mutant Cre<sup>+</sup> *R3 fl/fl* (n=4) littermate embryos, induced by 3 consecutive i.p. injections of 4-OHT (1 mg) administered to the pregnant female (E12-E14). Horizontal lines represent mean. (**h**) Whole-mount immunofluorescence of ear skin of 3 weeks old mice injected intraperitoneally with PBS (control) or AAV-VEGFR3-Ig at P7. Note regression of dermal LYVE1<sup>+</sup> lymphatic vessels (arrow) in the AAV-VEGFR3-Ig treated ear. \*  $P < 0.05$ , \*\*  $P < 0.01$ , \*\*\*  $P < 0.001$ . Two-tailed unpaired Student's *t*-test (**c**, **e-g**). Scale bars: 200  $\mu$ m (**h**).

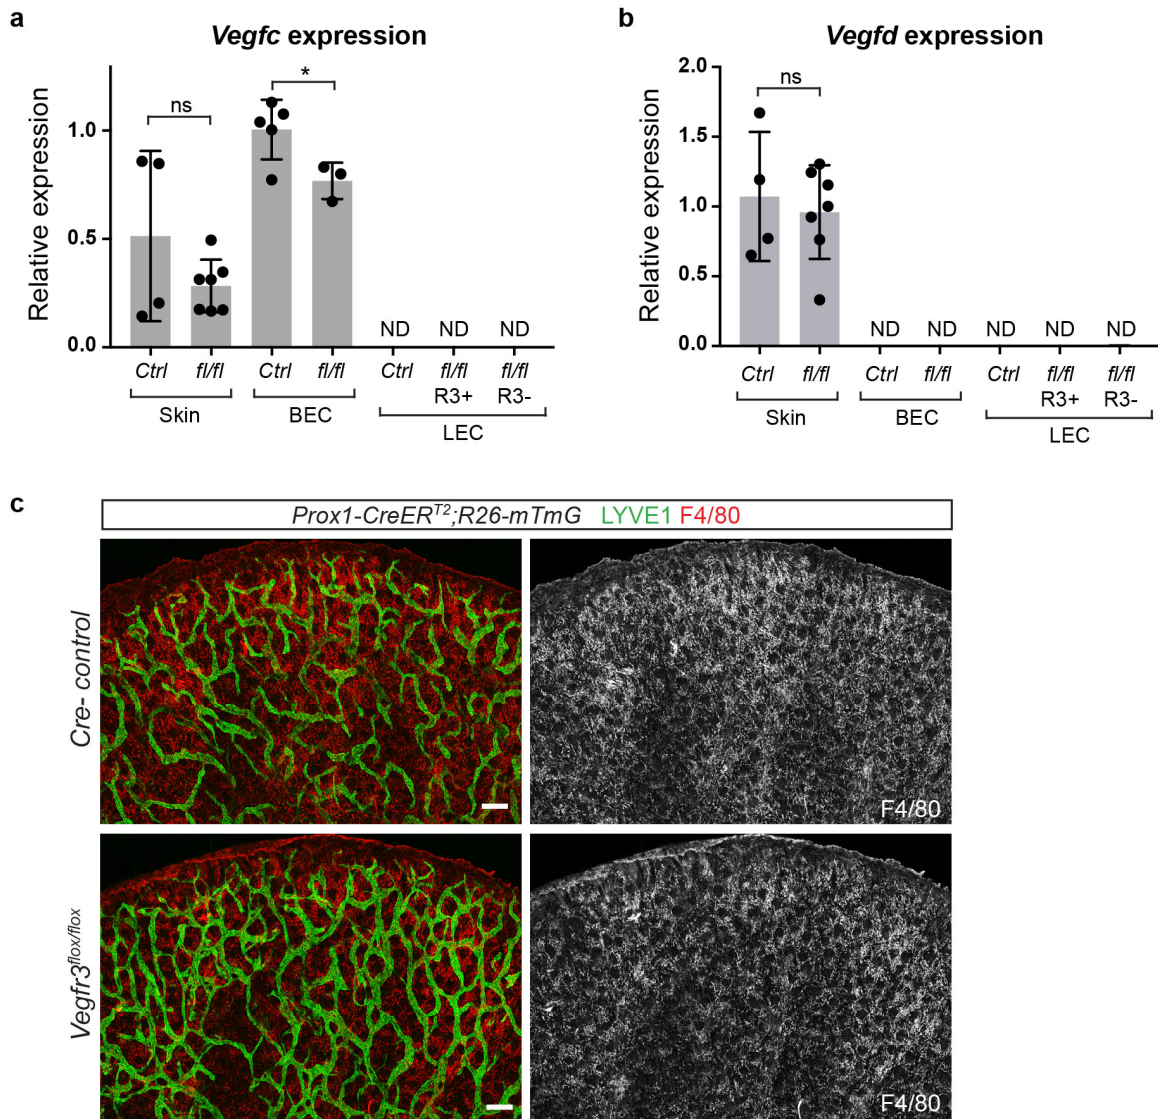

**Supplementary Figure 7 | Analysis of VEGFC/D expression in the *Vegfr3<sup>lox</sup>;R26-mTmG;Prox1-CreER<sup>T2</sup>* skin.** *Vegfc* (a) and *Vegfd* (*Figf*) (b) expression analysed by qRT-PCR in whole ear skin and FACS sorted BECs and LECs from P13-P14 *Vegfr3<sup>lox/lox</sup>;R26-mTmG;Prox1-CreER<sup>T2</sup>* (*fl/fl*) and Cre-negative (*Ctrl*) mice. Results from non-targeted (Tomato<sup>+</sup>GFP<sup>-</sup> ; R3<sup>+</sup>), and targeted (Tomato<sup>+</sup>GFP<sup>+</sup> ; R3<sup>-</sup>) LECs are shown separately. Bars represent mean relative expression, dots indicate individual mice (n=3-7 mice with n=2 technical replicates for each) ± s.d. ND, not detected. (c) Whole-mount immunofluorescence of ear skin of 3 weeks old *Vegfr3<sup>lox/lox</sup>;R26-mTmG;Prox1-CreER<sup>T2</sup>* and Cre-negative littermate mice treated with Tamoxifen at P2, P4 and P6. Single channel images for F4/80 staining are shown. \*  $P < 0.05$ , ns = not significant. Two-tailed unpaired Student's *t*-test (a, b). Scale bars: 200 μm (c).



**Fig. 5d**

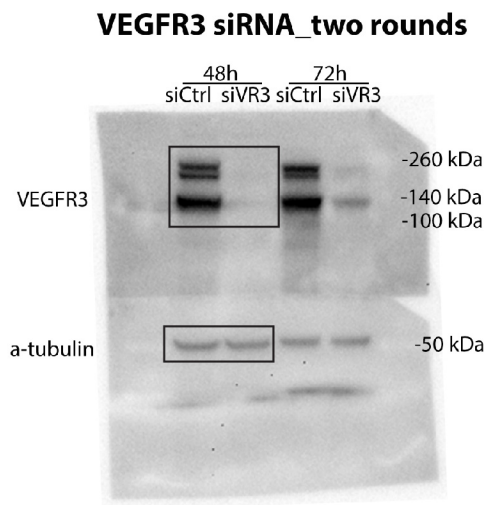

**Fig. 7e**

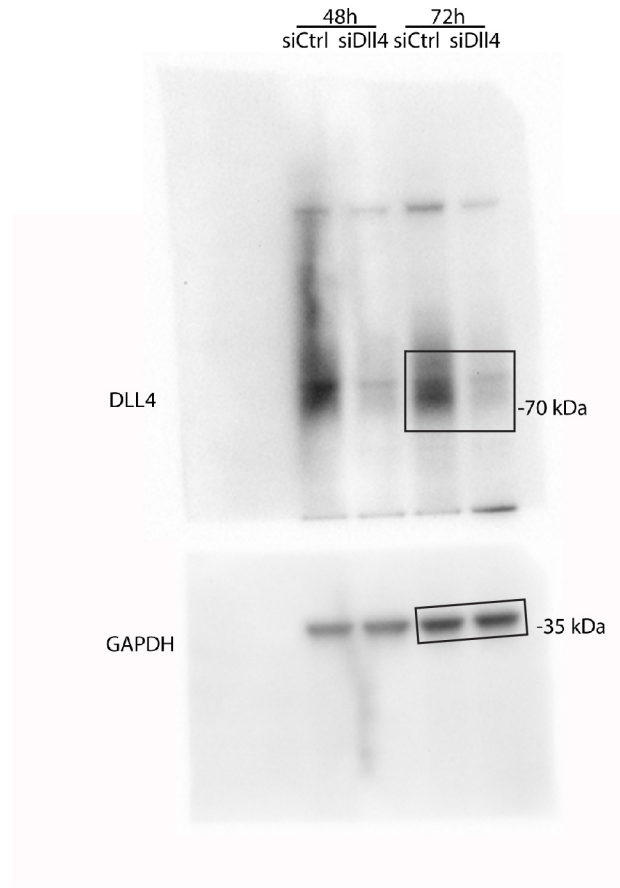

**Fig. 7c**

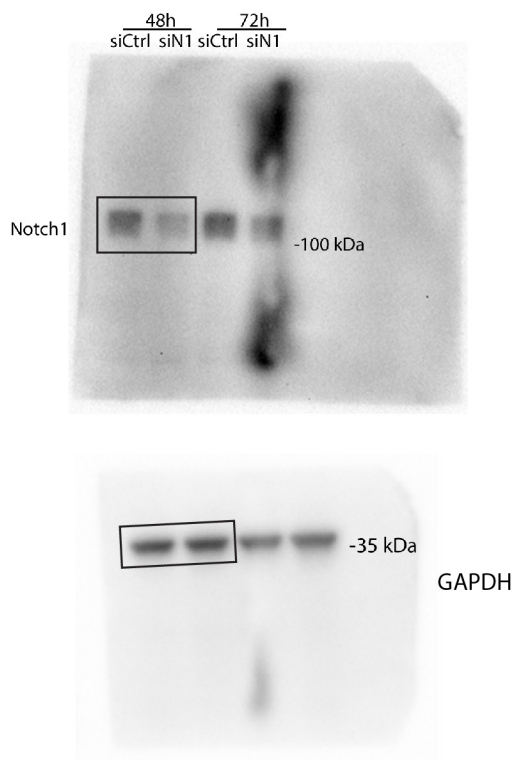

**Supplementary Fig. 8 | Full Western blots.** Portions of blots presented in Fig. 5d and Fig. 7c, e are indicated.
